# Supplementary material for: Higher mortality in patients with right hemispheric intracerebral haemorrhage: INTERACT1 and 2
Source: HighWire-hosted journal article supplement (doi:10.1136/jnnp-2014-309870), 2015-01-14
Supplement: jnnp-2014-309870supp_figures.pdf [file jnnp-2014-309870supp_figures.pdf]

**Online only supplemental figure S1. Flow chart of patient selection**

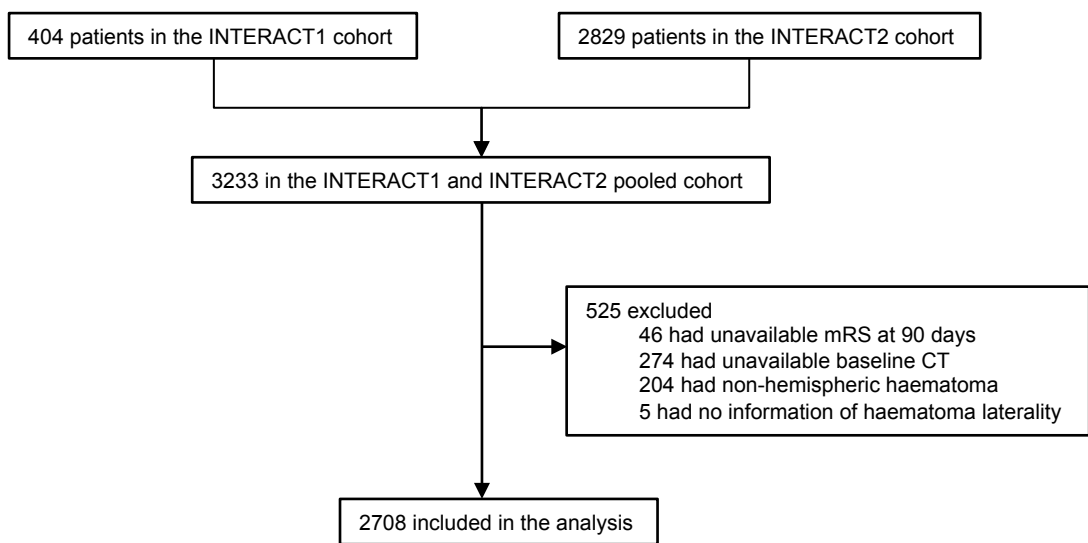

mRS indicates modified Rankin Scale

Online only supplemental figure S2. Distribution of NIHSS scores between hemispheric subgroups

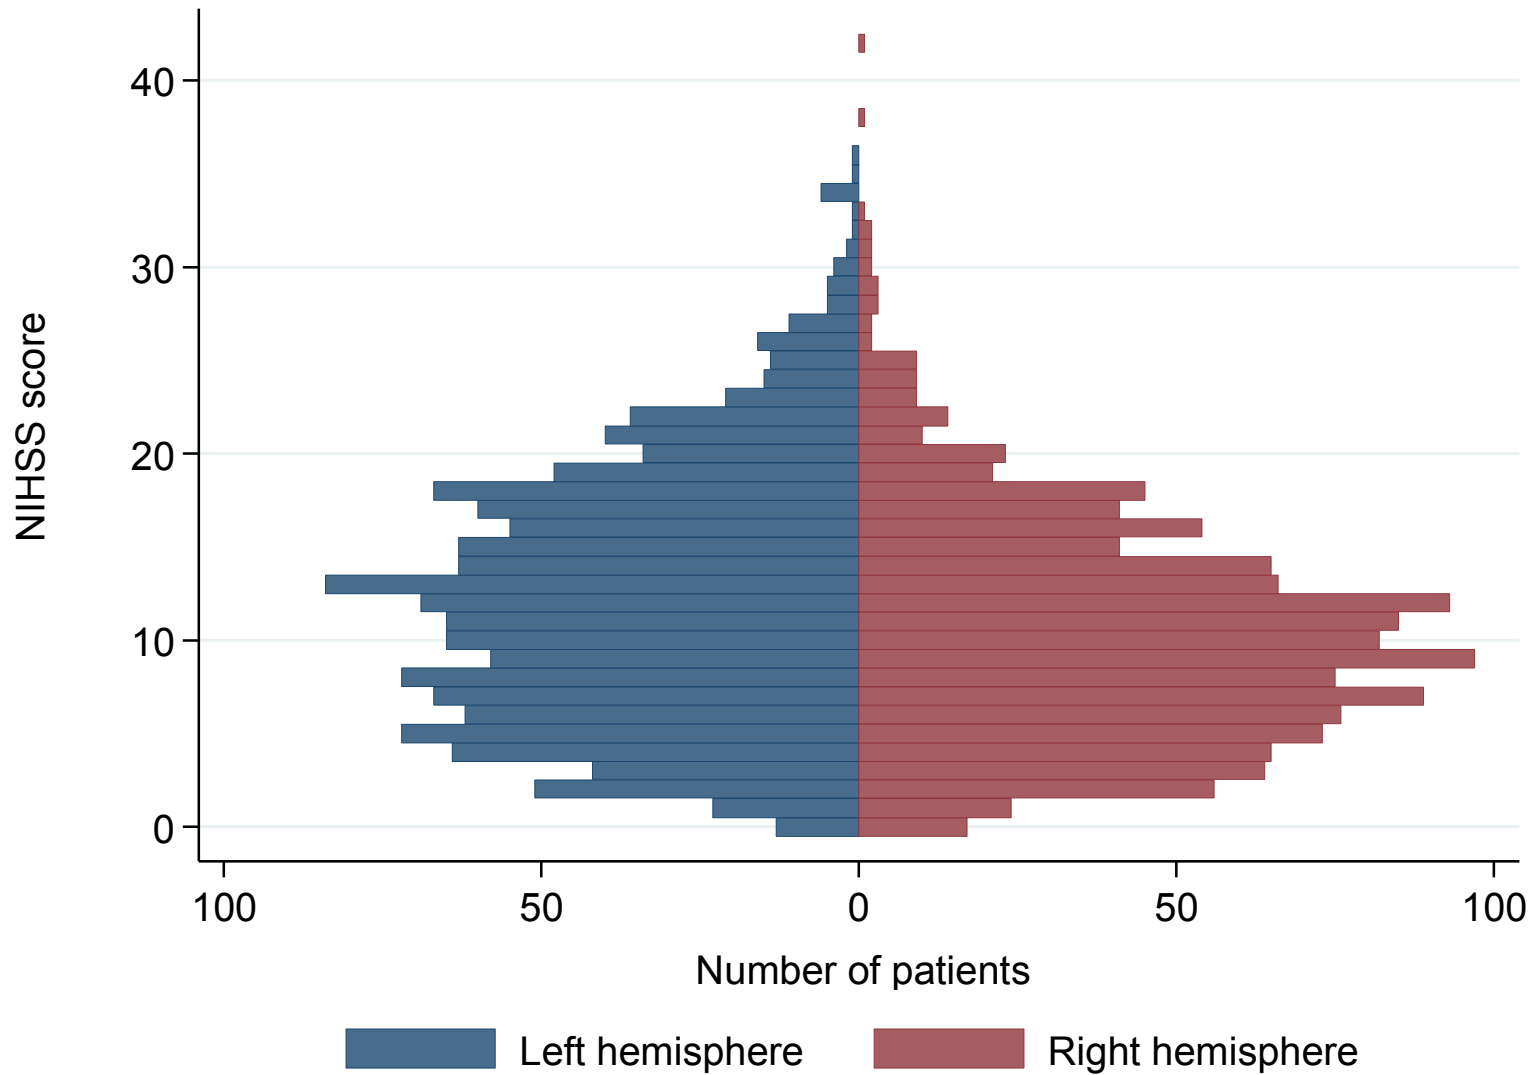

NIHSS indicates National Institutes of Health Stroke Scale

Online only supplemental figure S3. Kaplan-Meier curves for death with NIHSS in 2 categories.

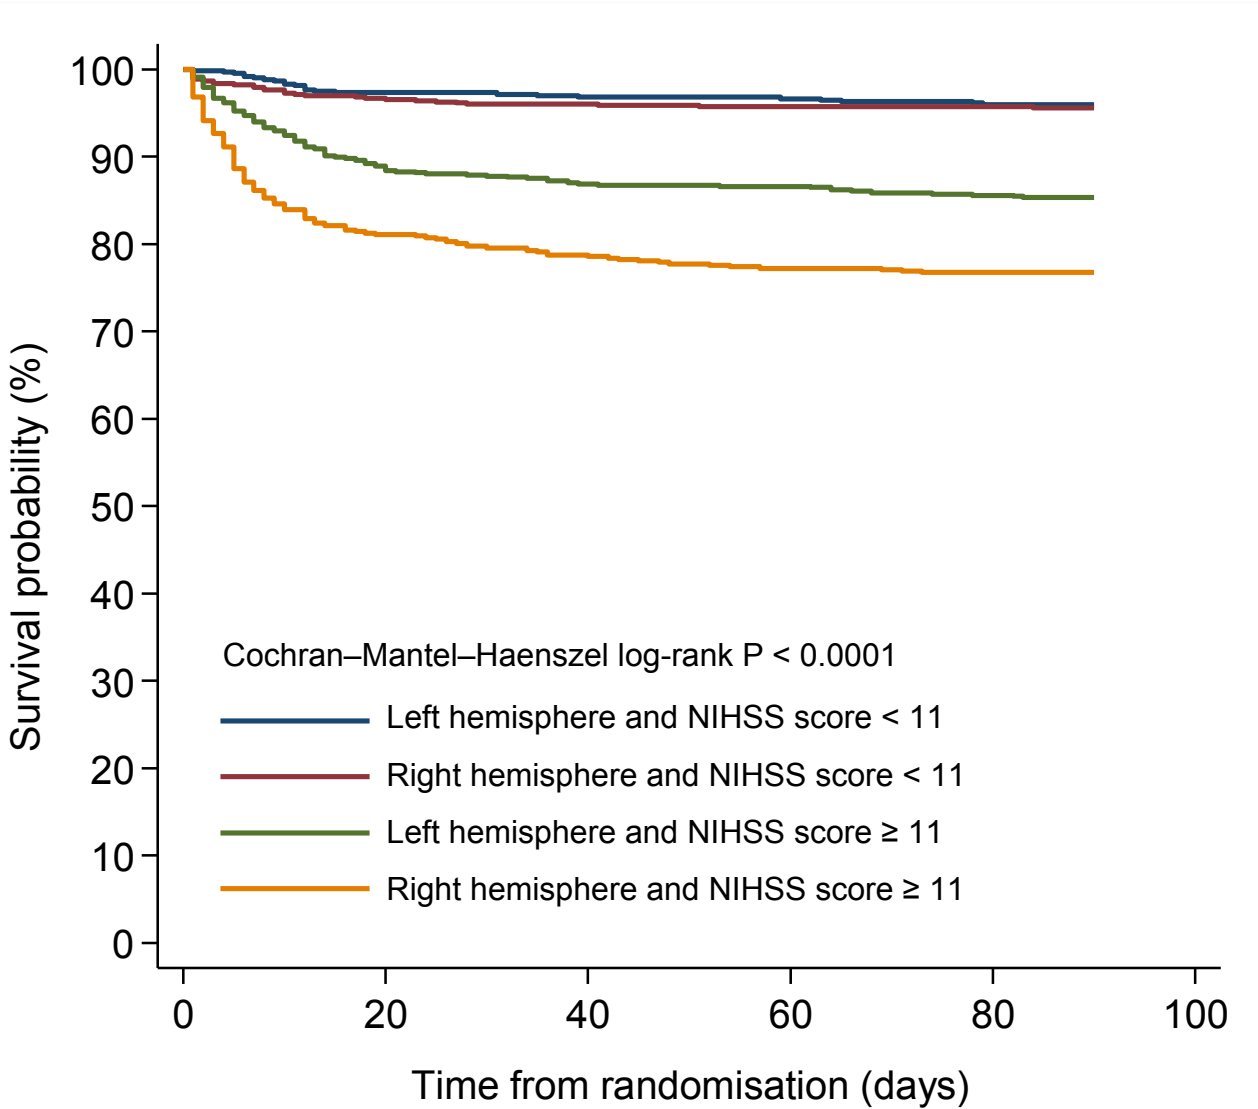

NIHSS indicates National Institutes of Health Stroke Scale
