# Supplementary material for: Higher mortality in patients with right hemispheric intracerebral haemorrhage: INTERACT1 and 2
Source: HighWire-hosted journal article supplement (doi:10.1136/jnnp-2014-309870), 2015-01-14
Supplement: jnnp-2014-309870supp_tables.pdf [file jnnp-2014-309870supp_tables.pdf]

**Online only supplemental table S1. Association between affected hemispheric and 90-day outcomes (Logistic regression models)**

|                           | Number of outcomes (%) | Crude |             |        | Multivariable-adjusted* |             |         |
|---------------------------|------------------------|-------|-------------|--------|-------------------------|-------------|---------|
|                           |                        | OR    | 95% CI      | P      | OR                      | 95% CI      | P       |
| Death                     |                        |       |             |        |                         |             |         |
| NIHSS score <11           |                        |       |             |        |                         |             |         |
| Left hemisphere           | 24/594 (4)             | 1.00  | (reference) |        | 1.00                    | (reference) |         |
| Right hemisphere          | 32/723 (4)             | 1.10  | 0.64-1.89   | 0.73   | 1.24                    | 0.67-2.27   | 0.50    |
| NIHSS score ≥11           |                        |       |             |        |                         |             |         |
| Left hemisphere           | 125/787 (16)           | 1.00  | (reference) |        | 1.00                    | (reference) |         |
| Right hemisphere          | 146/604 (24)           | 1.69  | 1.29-2.20   | 0.0001 | 2.01                    | 1.45-2.80   | <0.0001 |
| Death or major disability |                        |       |             |        |                         |             |         |
| NIHSS score <11           |                        |       |             |        |                         |             |         |
| Left hemisphere           | 196/594 (33)           | 1.00  | (reference) |        | 1.00                    | (reference) |         |
| Right hemisphere          | 215/723 (30)           | 0.86  | 0.68-1.09   | 0.20   | 0.86                    | 0.66-1.13   | 0.28    |
| NIHSS score ≥11           |                        |       |             |        |                         |             |         |
| Left hemisphere           | 573/787 (73)           | 1.00  | (reference) |        | 1.00                    | (reference) |         |
| Right hemisphere          | 484/604 (80)           | 1.51  | 1.17-1.94   | 0.002  | 1.74                    | 1.30-2.34   | 0.0002  |
| Major disability          |                        |       |             |        |                         |             |         |
| NIHSS score <11           |                        |       |             |        |                         |             |         |
| Left hemisphere           | 172/594 (29)           | 1.00  | (reference) |        | 1.00                    | (reference) |         |
| Right hemisphere          | 183/723 (25)           | 0.83  | 0.65-1.06   | 0.14   | 0.83                    | 0.63-1.09   | 0.17    |
| NIHSS score ≥11           |                        |       |             |        |                         |             |         |
| Left hemisphere           | 448/787 (57)           | 1.00  | (reference) |        | 1.00                    | (reference) |         |
| Right hemisphere          | 338/604 (56)           | 0.96  | 0.78-1.19   | 0.72   | 0.96                    | 0.76-1.21   | 0.70    |

NIHSS indicates National Institutes of Health Stroke Scale. \*Adjustment for age, sex, region, time from onset to randomisation, systolic blood pressure, GCS score (3 categories of <9, 9-12 and >12), glucose, baseline haematoma volume, deep haematoma location, intraventricular extension, trial, and randomised treatment. NIHSS <11 adjusted model run on n=1243, excluding 74 observations due to missing values, NIHSS ≥11 adjusted model run on n=1310, excluding 81 observations due to missing values.

**Online only supplemental table S2. Acute stroke care during the first 7 days by time of admission among INTERACT2 participants**

|                                                      | Right<br>(n=1156) | Left<br>(n=1205) | P       |
|------------------------------------------------------|-------------------|------------------|---------|
| Stroke care during the first 7 days from admission   |                   |                  |         |
| Intubation                                           | 76 (7)            | 86 (7)           | 0.65    |
| Admission to an intensive care unit                  | 403 (35)          | 478 (40)         | 0.02    |
| Nasogastric feeding                                  | 239 (21)          | 337 (28)         | <0.0001 |
| Pulse oximetry                                       | 780 (67)          | 878 (73)         | 0.005   |
| Swallowing assessment                                | 372 (32)          | 390 (32)         | 0.96    |
| Prophylactic treatment for deep-vein thrombosis      | 281 (24)          | 281 (23)         | 0.61    |
| Compression stockings                                | 136 (12)          | 132 (11)         | 0.58    |
| Subcutaneous heparin                                 | 223 (19)          | 232 (19)         | 1.00    |
| Use of intravenous mannitol                          | 682 (59)          | 723 (60)         | 0.65    |
| Haemostatic therapy                                  | 45 (4)            | 36 (3)           | 0.27    |
| Any surgical intervention                            | 58 (5)            | 79 (7)           | 0.13    |
| Evacuation or decompression of the haematoma         | 29 (3)            | 45 (4)           | 0.11    |
| Insertion of a ventricular drain                     | 35 (3)            | 40 (3)           | 0.77    |
| Decision to withdraw active treatment and care       | 59 (5)            | 47 (4)           | 0.19    |
| Duration of care                                     |                   |                  |         |
| Days of hospitalization, median (IQR)                | 20 (11-35)        | 21 (12-34)       | 0.11    |
| Days of staying at intensive care unit, median (IQR) | 5 (3-7)           | 5 (3-7)          | 0.73    |

Data are n (%) or median (interquartile range [IQR]), P values are based on chi-squared test or Kruskal-Wallis test.
